# Supplementary material for: Green tide development associated with submarine groundwater discharge in a coastal harbor, Jeju, Korea
Source: PubMed Central journal article supplement (PMC5524685; doi:10.1038/s41598-017-06711-0), 2017-07-24
Supplement: 41598_2017_6711_MOESM1_ESM.pdf [file 41598_2017_6711_MOESM1_ESM.pdf]

## **Supplementary Information**

### **Green tide development associated with submarine groundwater discharge in a coastal harbor, Jeju, Korea**

Hyeong Kyu Kwon<sup>1</sup>, Hyekyung Kang<sup>1</sup>, Yong Hwa Oh<sup>1</sup>, Sang Rul Park<sup>2</sup> & Guebuem Kim<sup>1\*</sup>

<sup>1</sup>School of Earth and Environmental Sciences, Seoul National University, Seoul 08826, Republic of Korea

<sup>2</sup>Department of Marine Life Sciences, Jeju National University, Jeju 63243, Republic of Korea

\*Corresponding author: [gkim@snu.ac.kr](mailto:gkim@snu.ac.kr)

**Table S1.** The concentrations of salinity,  $^{222}\text{Rn}$ , and nutrients in fresh groundwater, saline groundwater, harbor seawater, and open-ocean seawater in July 2015 in Jocheon, Jeju Island (S = surface, B = bottom and n.d. = non detect). Uncertainties of  $^{222}\text{Rn}$  activities are based on  $1\sigma$  counting error propagations.

| Sample              |         | Salinity | $^{222}\text{Rn}$      | Nutrients ( $\mu\text{M}$ ) |      | N:P ratio |
|---------------------|---------|----------|------------------------|-----------------------------|------|-----------|
|                     |         |          | ( $\text{Bq m}^{-3}$ ) | DIN                         | DIP  |           |
| Fresh groundwater   | F7      | 2.2      | 5920±60                | 400                         | 2.2  | 182       |
|                     | F8      | 4.6      | -                      | 390                         | 2.3  | 170       |
|                     | F9      | 0.3      | 4920±70                | 460                         | 2.3  | 200       |
| Saline groundwater  | S2      | 31.5     | -                      | 12                          | 0.32 | 37        |
|                     | S6      | 31.5     | -                      | 7.7                         | 0.35 | 22        |
|                     | S9      | 24.8     | -                      | 99                          | 0.80 | 124       |
|                     | S10     | 25.4     | -                      | 83                          | 0.71 | 117       |
| Harbor seawater     | H2 (S)  | 29.8     | 250±10                 | 43                          | 0.27 | 158       |
|                     | H2 (B)  | 32.1     | 98±7                   | 10                          | 0.02 | 505       |
|                     | H3 (S)  | 27.8     | 740±20                 | 70                          | 0.38 | 184       |
|                     | H3 (B)  | 32.0     | 89±7                   | 13                          | 0.07 | 180       |
|                     | H9 (S)  | 23.8     | 590±30                 | 112                         | 0.22 | 509       |
|                     | H16 (S) | 30.5     | 230±20                 | 39                          | 0.22 | 175       |
|                     | H17 (S) | 29.8     | 100±11                 | 73                          | 0.43 | 170       |
|                     | H17 (B) | 32.7     | 71±7                   | 4.8                         | 0.02 | 240       |
|                     | H19 (S) | 25.8     | 270±10                 | 81                          | 0.08 | 1013      |
|                     | H21 (S) | 32.3     | 44±9                   | 4.5                         | n.d. | -         |
|                     | H21 (B) | 32.7     | 20±3                   | 4.5                         | 0.09 | 50        |
|                     | H22 (S) | 31.7     | -                      | 11                          | n.d. | -         |
|                     | H23 (S) | 28.4     | 370±20                 | 67                          | 0.39 | 172       |
|                     | H23 (B) | 32.4     | 12±3                   | 4.2                         | n.d. | -         |
|                     | H24 (S) | 31.7     | 200±10                 | 40                          | 0.23 | 173       |
|                     | H24 (B) | 32.3     | 23±7                   | 4.8                         | n.d. | -         |
|                     | H27 (S) | 29.6     | 140±10                 | 55                          | 0.35 | 157       |
|                     | H27 (B) | 32.4     | 110±10                 | 6.1                         | 0.09 | 68        |
| H28 (S)             | 29.9    | 180±10   | 72                     | 0.44                        | 164  |           |
| H28 (B)             | 32.4    | 43±4     | 6.2                    | 0.05                        | 124  |           |
| Open-ocean seawater | O1 (S)  | 32.4     | 23±4                   | n.d.                        | n.d. | -         |
|                     | O1 (B)  | 32.6     | 16±6                   | 0.88                        | n.d. | -         |

**Table S2.** The concentrations of salinity,  $^{222}\text{Rn}$ , and nutrients in fresh groundwater, saline groundwater, harbor seawater, and open-ocean seawater in August 2015 in Jocheon, Jeju Island (S = surface, B = bottom and n.d. = not detected). Uncertainties of  $^{222}\text{Rn}$  activities are based on  $1\sigma$  counting error propagations.

| Sample              | Salinity | $^{222}\text{Rn}$      | Nutrients ( $\mu\text{M}$ ) |      | N:P ratio |     |
|---------------------|----------|------------------------|-----------------------------|------|-----------|-----|
|                     |          | ( $\text{Bq m}^{-3}$ ) | DIN                         | DIP  |           |     |
| Fresh groundwater   | F1       | 1.6                    | 2490 $\pm$ 40               | 490  | 2.4       | 204 |
|                     | F2       | 0.2                    | 1550 $\pm$ 30               | 580  | 2.8       | 207 |
|                     | F3       | 0.2                    | 2060 $\pm$ 40               | 490  | 4.3       | 114 |
|                     | F4       | 2.6                    | 3510 $\pm$ 60               | 380  | 2.4       | 158 |
|                     | F9       | 0.2                    | 8270 $\pm$ 190              | 510  | 2.2       | 232 |
|                     | F10      | 0.4                    | -                           | 650  | 2.5       | 260 |
| Saline groundwater  | S2       | 15.0                   | 1070 $\pm$ 20               | 225  | 3.5       | 64  |
|                     | S3       | 31.6                   | 85 $\pm$ 17                 | 32   | 1.7       | 19  |
|                     | S4       | 32.5                   | 69 $\pm$ 5                  | 5.1  | 0.43      | 12  |
|                     | S5       | 32.7                   | 84 $\pm$ 15                 | 9.0  | 0.48      | 19  |
|                     | S6       | 33.0                   | 130 $\pm$ 10                | 4.4  | 0.33      | 13  |
|                     | S7       | 32.7                   | 30 $\pm$ 58                 | 12   | 0.60      | 19  |
|                     | S11      | 27.8                   | 740 $\pm$ 40                | 56   | n.d.      | -   |
|                     | S12      | 30.6                   | 130 $\pm$ 10                | 18   | 0.07      | 250 |
|                     | S13      | 31.4                   | 150 $\pm$ 20                | 16   | 0.06      | 262 |
| Harbor seawater     | H1 (S)   | 31.7                   | 60 $\pm$ 5                  | 9.8  | n.d.      | -   |
|                     | H2 (S)   | 31.9                   | 60 $\pm$ 5                  | 7.9  | n.d.      | -   |
|                     | H5 (S)   | 28.6                   | 81 $\pm$ 5                  | 42   | 0.08      | 521 |
|                     | H6 (S)   | 28.4                   | 240 $\pm$ 10                | 49   | 0.08      | 618 |
|                     | H7 (S)   | 27.9                   | 200 $\pm$ 10                | 88   | 0.26      | 338 |
|                     | H8 (S)   | 30.5                   | 140 $\pm$ 10                | 55   | 0.07      | 786 |
|                     | H10 (S)  | 25.2                   | 120 $\pm$ 10                | 41   | n.d.      | -   |
|                     | H11 (S)  | 28.4                   | 160 $\pm$ 10                | 23   | 0.04      | 575 |
|                     | H12 (S)  | 29.2                   | 130 $\pm$ 10                | 13   | n.d.      | -   |
|                     | H13 (S)  | 31.3                   | 100 $\pm$ 10                | 18   | n.d.      | -   |
|                     | H14 (S)  | 28.7                   | 290 $\pm$ 10                | 55   | 0.09      | 611 |
|                     | H15 (S)  | 28.4                   | 190 $\pm$ 10                | 51   | 0.09      | 567 |
|                     | H16 (S)  | 29.0                   | 210 $\pm$ 10                | 37   | 0.05      | 738 |
|                     | H18 (S)  | 31.9                   | 26 $\pm$ 7                  | 17   | n.d.      | -   |
|                     | H20 (S)  | 32.1                   | 25 $\pm$ 10                 | 6.5  | n.d.      | -   |
|                     | H21 (S)  | 32.0                   | 16 $\pm$ 3                  | 2.5  | n.d.      | -   |
|                     | H22 (S)  | 32.1                   | 10 $\pm$ 3                  | 2.9  | n.d.      | -   |
|                     | H23 (S)  | 32.1                   | 13 $\pm$ 5                  | 2.4  | n.d.      | -   |
|                     | H24 (S)  | 32.2                   | 26 $\pm$ 6                  | 2.2  | n.d.      | -   |
|                     | H25 (S)  | 31.6                   | 40 $\pm$ 5                  | 7.7  | n.d.      | -   |
| H26 (S)             | 32.3     | 24 $\pm$ 3             | 0.9                         | n.d. | -         |     |
| H28 (S)             | 30.3     | 68 $\pm$ 5             | 15                          | n.d. | -         |     |
| Open-ocean seawater | O1 (S)   | 32.5                   | 4 $\pm$ 2                   | 0.8  | n.d.      | -   |

**Table S3.** The concentrations of salinity,  $^{222}\text{Rn}$ , and nutrients in fresh groundwater, saline groundwater, harbor seawater, and open-ocean seawater in February 2016 in Jocheon, Jeju Island (S = surface, B = bottom and n.d. = not detected). Uncertainties of  $^{222}\text{Rn}$  activities are based on  $1\sigma$  counting error propagations.

| Sample              | Salinity | $^{222}\text{Rn}$      | Nutrients ( $\mu\text{M}$ ) |      | N:P ratio |     |
|---------------------|----------|------------------------|-----------------------------|------|-----------|-----|
|                     |          | ( $\text{Bq m}^{-3}$ ) | DIN                         | DIP  |           |     |
| Fresh groundwater   | F1       | 0.8                    | 1700±30                     | 400  | 2.9       | 138 |
|                     | F2       | 0.7                    | 1400±40                     | 430  | 3.0       | 143 |
|                     | F3       | 0.3                    | 1910±30                     | 440  | 4.0       | 110 |
|                     | F4       | 0.9                    | 5720±90                     | 400  | 2.3       | 182 |
|                     | F5       | 1.0                    | 6310±80                     | 480  | 2.0       | 240 |
|                     | F6       | 0.2                    | 6100±70                     | 440  | 2.3       | 191 |
|                     | F7       | 1.0                    | 5690±60                     | 460  | 2.0       | 230 |
|                     | F8       | 0.4                    | 3860±40                     | 490  | 2.2       | 223 |
|                     | F9       | 1.4                    | 3540±40                     | 490  | 1.9       | 258 |
| Saline groundwater  | S1       | 34.1                   | -                           | 9.2  | 0.47      | 20  |
|                     | S2       | 34.0                   | -                           | 13   | 0.73      | 18  |
|                     | S3       | 33.8                   | -                           | 11   | 0.53      | 21  |
|                     | S8       | 33.8                   | -                           | 11   | 0.36      | 32  |
|                     | S11      | 34.1                   | -                           | 10   | 0.46      | 22  |
|                     | S13      | 34.4                   | -                           | 6.5  | 0.48      | 13  |
|                     | S14      | 34.2                   | -                           | 10   | 0.48      | 21  |
| Harbor seawater     | H2 (S)   | 32.9                   | 100±10                      | 19   | 0.34      | 54  |
|                     | H2 (B)   | 34.1                   | 13±3                        | 6.9  | 0.36      | 19  |
|                     | H3 (S)   | 33.2                   | 6±4                         | 8.1  | 0.37      | 22  |
|                     | H3 (B)   | 34.4                   | 13±5                        | 7.5  | 0.37      | 20  |
|                     | H5 (S)   | 31.8                   | 120±10                      | 32   | 0.36      | 89  |
|                     | H5 (B)   | 34.0                   | 100±10                      | 27   | 0.40      | 68  |
|                     | H6 (S)   | 31.4                   | 160±10                      | 44   | 0.34      | 129 |
|                     | H6 (B)   | 31.7                   | 140±10                      | 27   | 0.41      | 67  |
|                     | H8 (S)   | 31.0                   | 260±10                      | 41   | 0.34      | 121 |
|                     | H8 (B)   | 32.9                   | 106±9                       | 23   | 0.41      | 57  |
|                     | H10 (S)  | 33.4                   | 28±4                        | 11   | 0.34      | 31  |
|                     | H10 (B)  | 34.4                   | 31±5                        | 6.7  | 0.30      | 22  |
|                     | H14 (S)  | 34.1                   | 40±5                        | 5.9  | 0.34      | 17  |
|                     | H14 (B)  | 34.3                   | 44±6                        | 11   | 0.40      | 28  |
|                     | H16 (S)  | 34.0                   | 110±10                      | 25   | 0.36      | 70  |
|                     | H16 (B)  | 34.4                   | 5±3                         | 7.1  | 0.36      | 20  |
|                     | H21 (S)  | 34.0                   | 20±5                        | 7.3  | 0.39      | 19  |
|                     | H21 (B)  | 34.5                   | 8±4                         | 6.4  | 0.34      | 19  |
| H24 (S)             | 34.3     | 6±3                    | 8.6                         | 0.38 | 23        |     |
| H24 (B)             | 34.5     | 12±4                   | 7.2                         | 0.35 | 21        |     |
| Open-ocean seawater | O2 (S)   | 34.6                   | 4±3                         | 6.0  | 0.39      | 15  |
|                     | O3 (S)   | 34.6                   | 21±4                        | 5.1  | 0.38      | 13  |
|                     | O4 (S)   | 34.5                   | 24±5                        | 5.1  | 0.41      | 12  |

**Table S4.** The concentrations of salinity,  $^{222}\text{Rn}$ , and nutrients in fresh groundwater, harbor seawater, and open-ocean seawater in March 2016 in Jocheon, Jeju Island (S = surface, B = bottom and n.d. = not detected). Uncertainties of  $^{222}\text{Rn}$  activities are based on  $1\sigma$  counting error propagations.

| Sample              | Salinity | $^{222}\text{Rn}$      | Nutrients ( $\mu\text{M}$ ) |      | N:P ratio |     |
|---------------------|----------|------------------------|-----------------------------|------|-----------|-----|
|                     |          | ( $\text{Bq m}^{-3}$ ) | DIN                         | DIP  |           |     |
| Fresh groundwater   | F1       | 0.2                    | 2780±50                     | 410  | 2.6       | 158 |
|                     | F2       | 0.2                    | 2170±40                     | 430  | 2.6       | 165 |
|                     | F3       | 0.2                    | 1880±40                     | 410  | 3.8       | 108 |
|                     | F4       | 0.9                    | 4840±80                     | 390  | 2.8       | 139 |
|                     | F7       | 0.2                    | 4260±60                     | 460  | 2.5       | 184 |
|                     | F8       | 0.2                    | 3360±50                     | 480  | 2.3       | 209 |
|                     | F9       | 0.2                    | 5360±100                    | 480  | 2.4       | 200 |
| Harbor seawater     | H2 (S)   | 33.2                   | 160±10                      | 20   | 0.06      | 337 |
|                     | H2 (B)   | 34.6                   | 47±8                        | 0.8  | n.d.      | -   |
|                     | H3 (S)   | 32.8                   | 160±20                      | 14   | 0.10      | 142 |
|                     | H3 (B)   | 34.2                   | 33±5                        | 1.7  | 0.02      | 85  |
|                     | H4 (S)   | 29.4                   | 430±20                      | 35   | 0.14      | 251 |
|                     | H4 (B)   | 34.4                   | 55±7                        | 1.3  | 0.03      | 43  |
|                     | H6 (S)   | 27.9                   | 560±20                      | 63   | 0.26      | 242 |
|                     | H8 (S)   | 30.7                   | 260±10                      | 45   | 0.12      | 378 |
|                     | H10 (S)  | 31.7                   | 240±10                      | 35   | 0.14      | 252 |
|                     | H10 (B)  | 34.6                   | 29±10                       | 0.5  | 0.01      | 50  |
|                     | H14 (S)  | 31.3                   | -                           | 50   | 0.14      | 357 |
|                     | H14 (B)  | 34.6                   | -                           | 0.5  | 0.07      | 7   |
|                     | H16 (S)  | 31.2                   | 140±10                      | 18   | 0.07      | 254 |
|                     | H16 (B)  | 34.6                   | 23±6                        | 1.1  | 0.02      | 55  |
|                     | H21 (S)  | 33.7                   | 51±12                       | 11   | 0.03      | 373 |
|                     | H21 (B)  | 34.7                   | 17±4                        | 0.3  | n.d.      | -   |
| H24 (S)             | 34.2     | 58±7                   | 4.6                         | 0.01 | 460       |     |
| H24 (B)             | 34.6     | 19±9                   | 0.5                         | 0.01 | 50        |     |
| Open-ocean seawater | O2 (S)   | 34.8                   | 4±4                         | 1.0  | 0.02      | 50  |
|                     | O3 (S)   | 34.7                   | 19±4                        | 0.6  | 0.01      | 60  |
|                     | O4 (S)   | 34.7                   | 14±7                        | 0.7  | n.d.      | -   |

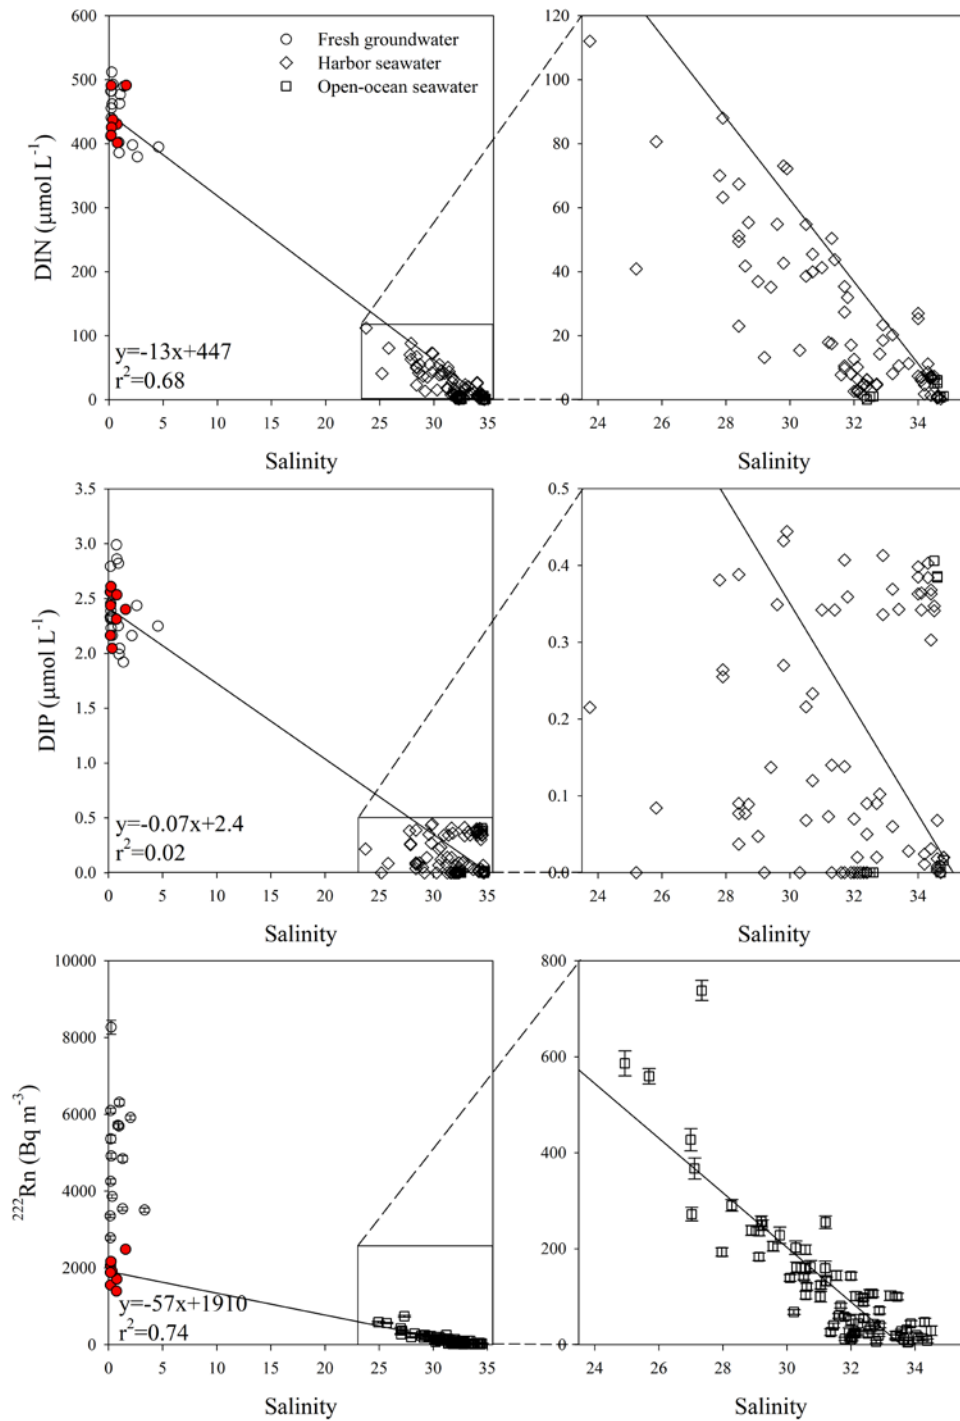

**Figure S1.** Plots of salinity versus DIN, DIP, and  $^{222}\text{Rn}$  concentrations in fresh groundwater and seawater. The solid line indicates the conservative mixing between the two end-members (fresh groundwater and seawater). The red circles represent the major springs based on the  $^{222}\text{Rn}$  extrapolation from harbor seawater.

## References

- (1) Ullman, W. J. & Sandstrom, M. W. Dissolved nutrient fluxes from the nearshore sediments of Bowling Green Bay, central Great Barrier Reef lagoon (Australia). *Estuar. Coast. Shelf Sci.* **24**, 289-303 (1987).
- (2) Lerat, Y., Lasserre, P. & Corre, P. Seasonal changes in pore water concentrations of nutrients and their diffusive fluxes at the sediment-water interface. *J. Exp. Mar. Biol. Ecol.* **135**, 135-160 (1990).
- (3) Kuwae, T., Hosokawa, Y. & Eguchi, N. Dissolved inorganic nitrogen cycling in Banzu intertidal sand-flat, Japan. *Mangr. Salt Marsh.* **2**, 167-175 (1998).
- (4) Knoppers, B. *et al.* In situ measurements of benthic primary production, respiration and nutrient fluxes in a hypersaline coastal lagoon of SE Brazil. *Rev. Bra. Oceanogr.* **44**, 155–165 (1996).
- (5) Stimson, J. & Larned, S. T. Nitrogen efflux from the sediments of a subtropical bay and the potential contribution to macroalgal nutrient requirements. *J. Exp. Mar. Biol. Ecol.* **252**, 159–180 (2000).
- (6) Rasheed, M., Badran, M. I. & Huettel, M. Influence of sediment permeability and mineral composition on organic matter degradation in three sediments from the Gulf of Aqaba, Red Sea. *Estuar. Coast. Shelf Sci.* **57**, 369-384 (2003).
- (7) Dixon, L. K., Murphy, P. J., Becker, N. M. & Charniga, C. M. The potential role of benthic nutrient flux in support of *Karenia* blooms in west Florida (USA) estuaries and the nearshore Gulf of Mexico. *Harmful Algae* **38**, 30-39 (2014).
- (8) Sundback, K. *et al.* Importance of benthic nutrient regeneration during initiation of macroalgal blooms in shallow bays. *Mar. Ecol. Prog. Ser.* **246**, 115-126 (2003).

(9) Ospina-Alvarez, N. *et al.* Exchange of nutrients across the sediment-water interface in intertidal rea systems (SW Europe). *J. Sea Res.* **85**, 349-358 (2014).
